# Supplementary material
Source: publisher site journal article supplement (https://www.dovepress.com/article/303544)
Supplement: Supplementary file 1 [file get_supplementary_file.php]

| Gene name | Forward 5’-3’ | Reverse 5’-3’ | Product length | Tm(℃) |
| --- | --- | --- | --- | --- |
| Human MTA1 | CGAGTCGCTCAAGTCCTACCT | GTCGGTGATGTCTGCCTGGTA | 136 | 60 |
| Human PKMYT1 | CAGCAGCGGATGTGTTCAGTC | AGAACGCAGCTCGGAAGACA | 149 | 60 |
| Human FZR1 | CTCACTGCCTCCGTCTGTTCAT | GCGTCTGGTGGTCTGTTCTGT | 92 | 60 |
| Human GAPDH | AGCCACATCGCTCAGACAC | GCCCAATACGACCAAATCC | 66 | 60 |

**Table S1 The specific primers for realtime PCR in this study**

**Table S2 The number of genes in the 20 modules**

| Module colors | Gene. num |
| --- | --- |
| black | 481 |
| blue | 3475 |
| brown | 4658 |
| darkgreen | 198 |
| darkgrey | 163 |
| darkmagenta | 169 |
| darkolivegreen | 79 |
| darkorange | 147 |
| darkturquoise | 934 |
| grey60 | 235 |
| lightcyan | 244 |
| lightgreen | 226 |
| magenta | 662 |
| orange | 155 |
| paleturquoise | 321 |
| pink | 369 |
| skyblue3 | 60 |
| tan | 308 |
| yellowgreen | 73 |
| grey | 5 |

**Table S3 GO enrichment analysis**

| Accession no. | Term | Gene counts | Adjusted P-Value |
| --- | --- | --- | --- |
| GO:0000398 | mRNA splicing, via spliceosome | 79 | 2.07E-09 |
| GO:0051301 | cell division | 105 | 6.06E-08 |
| GO:0045893 | positive regulation of transcription, DNA-templated | 138 | 3.00E-07 |
| GO:0006281 | DNA repair | 76 | 1.01E-06 |
| GO:0006351 | transcription, DNA-templated | 405 | 1.78E-06 |
| GO:0006406 | mRNA export from nucleus | 42 | 2.63E-06 |
| GO:0016032 | viral process | 89 | 3.35E-06 |
| GO:0016925 | protein sumoylation | 46 | 4.86E-06 |
| GO:0045892 | negative regulation of transcription, DNA-templated | 130 | 7.25E-06 |
| GO:0006260 | DNA replication | 55 | 8.62E-06 |
| GO:0006409 | tRNA export from nucleus | 20 | 4.78E-05 |
| GO:0006890 | retrograde vesicle-mediated transport, Golgi to ER | 33 | 0.000641 |
| GO:0006338 | chromatin remodeling | 34 | 0.00067 |
| GO:0000082 | G1/S transition of mitotic cell cycle | 38 | 0.000709 |
| GO:0007059 | chromosome segregation | 29 | 0.000941 |
| GO:0000086 | G2/M transition of mitotic cell cycle | 46 | 0.001121 |
| GO:0007067 | mitotic nuclear division | 70 | 0.001887 |
| GO:0010827 | regulation of glucose transport | 18 | 0.004069 |
| GO:0006396 | RNA processing | 35 | 0.005109 |
| GO:0007077 | mitotic nuclear envelope disassembly | 21 | 0.006452 |

**Table S4 KEGG enrichment analysis**

| ID | Term | Gene counts | Adjusted P-Value |
| --- | --- | --- | --- |
| hsa05200 | Pathways in cancer | 93 | 4.01605E-06 |
| hsa04110 | Cell cycle | 42 | 4.46998E-06 |
| hsa03040 | Spliceosome | 44 | 4.82995E-06 |
| hsa04120 | Ubiquitin mediated proteolysis | 42 | 2.52026E-05 |
| hsa01100 | Metabolic pathways | 206 | 0.000116664 |
| hsa03013 | RNA transport | 45 | 0.000176848 |
| hsa04144 | Endocytosis | 60 | 0.000245287 |
| hsa04152 | AMPK signaling pathway | 35 | 0.000436527 |
| hsa03015 | mRNA surveillance pathway | 28 | 0.000623514 |
| hsa05230 | Central carbon metabolism in cancer | 23 | 0.000993982 |
| hsa04919 | Thyroid hormone signaling pathway | 31 | 0.002730867 |
| hsa05222 | Small cell lung cancer | 25 | 0.002731696 |
| hsa04210 | Apoptosis | 34 | 0.003550006 |
| hsa03030 | DNA replication | 14 | 0.004587812 |
| hsa04150 | mTOR signaling pathway | 34 | 0.009342068 |
| hsa04340 | Hedgehog signaling pathway | 15 | 0.009342068 |
| hsa04012 | ErbB signaling pathway | 22 | 0.017460971 |
| hsa05212 | Pancreatic cancer | 18 | 0.01917482 |
| hsa04115 | p53 signaling pathway | 18 | 0.020978412 |
| hsa05223 | Non-small cell lung cancer | 16 | 0.021021957 |

**Table S5 The top 10 genes sorted by the total number of intramodular connectivity**

| Gene | Hub genes in blue module | Hub genes in PPI network | Total number |
| --- | --- | --- | --- |
| intramodular connectivity | intramodular connectivity |
| MTA1 | 48 | 6 | 54 |
| FZR1 | 49 | 4 | 53 |
| PKMYT1 | 49 | 4 | 53 |
| CBX2 | 49 | 3 | 52 |
| CDC25B | 49 | 3 | 52 |
| CBX8 | 48 | 3 | 51 |
| EHMT2 | 48 | 3 | 51 |
| KIF22 | 49 | 2 | 51 |
| MYBL2 | 49 | 2 | 51 |
| SPC24 | 49 | 2 | 51 |


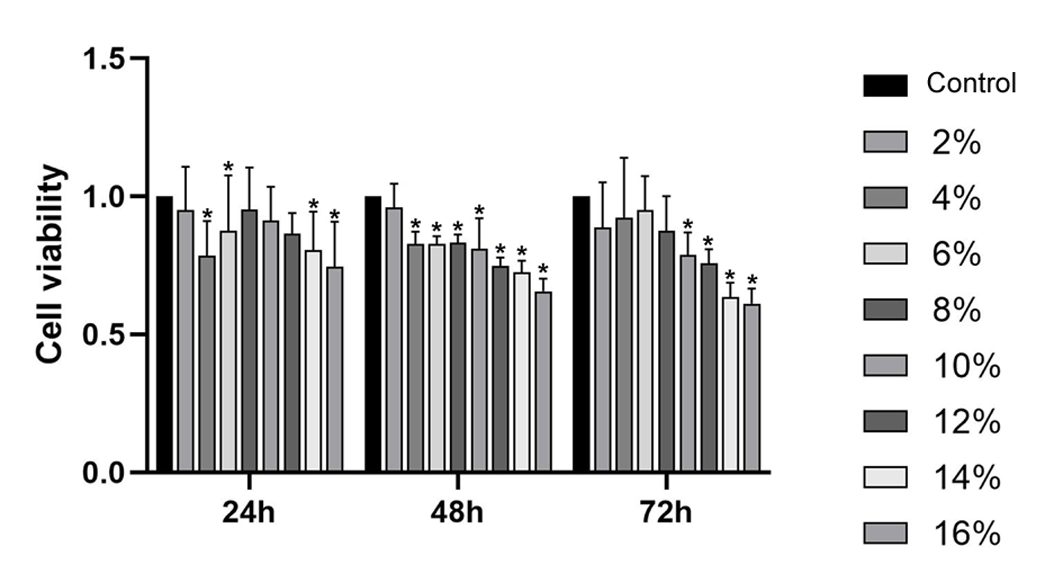


**Supplementary Figure S1 Cell viability of A549 after CSE treatment assessed by CCK8 assay.** *****P < 0.05 vs Control group.
